# Supplementary material
Source: Springer Nature journal article supplement (https://www.springermedizin.de/resource/supplementary/12916_2006_96_MOESM14_ESM.pdf/9599160)

# Control graph

Illustration L: Childhood cancers (0 to 14 years)

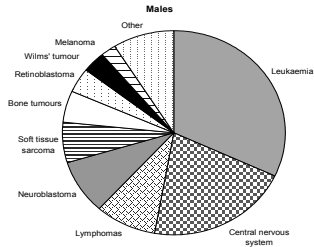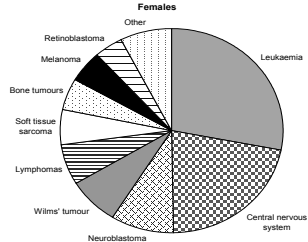

# Intervention graph

Illustration L: Childhood cancers (0 to 14 years)

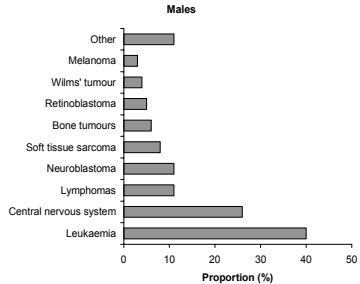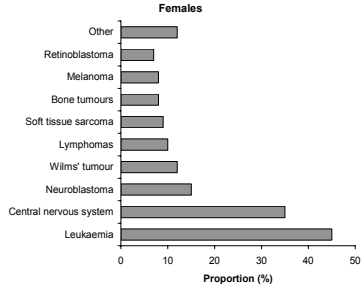

Supplement: MOESM14 [file 9599160]
